# Supplementary material
Source: PubMed Central journal article supplement (PMC3873721)
Supplement: NIHMS527120-supplement-Tab_1-4.pdf [file NIHMS527120-supplement-Tab_1-4.pdf]

**Supplementary table 1.** Characteristics of patients with Lynch syndrome.

| Characteristic                                                                             | Germline MMR gene mutation (n=312) |                |              |              |
|--------------------------------------------------------------------------------------------|------------------------------------|----------------|--------------|--------------|
|                                                                                            | <i>MLH1</i>                        | <i>MSH2</i>    | <i>MSH6</i>  | <i>PMS2</i>  |
| Probands –no.                                                                              | 114                                | 129            | 40           | 29           |
| Male gender –no. (%)                                                                       | 38/82 (46.3)                       | 46/93 (49.5)   | 24/32 (75.0) | 17/28 (60.7) |
| Age (years.) <sup>a</sup>                                                                  | 47.2 ± 11.7                        | 46.4 ± 12.2    | 53.8 ± 16.6  | 50.1 ± 12.6  |
| Proximal CRC –no. (%) <sup>b,c</sup>                                                       | 55/78 (70.5)                       | 50/86 (58.1)   | 10/23 (43.5) | 14/20 (70.0) |
| Mucinous CRC –no. (%) <sup>b</sup>                                                         | 16/78 (20.5)                       | 24/81 (29.6)   | 7/24 (29.2)  | 5/18 (27.8)  |
| Synchronous or metachronous CRC –no. (%) <sup>b</sup>                                      | 21/86 (24.4)                       | 23/95 (24.2)   | 5/35 (15.6)  | 1/28 (3.6)   |
| Metachronous Lynch syndrome-related tumor (CRC excluded) –no. (%) <sup>b,d</sup>           | 6/114 (5.3)                        | 12/129 (9.3)   | - (-)        | 3/29 (10.3)  |
| At least one first-degree relative with CRC –no. (%) <sup>b</sup>                          | 57/113 (50.4)                      | 64/126 (50.8)  | 5/40 (12.5)  | 5/29 (17.2)  |
| Fulfillment of at least one criterion of revised Bethesda guidelines –no. (%) <sup>b</sup> | 83/86 (96.5)                       | 89/97 (91.8)   | 19/32 (59.4) | 23/28 (82.1) |
| Fulfillment of Amsterdam I criteria –no. (%) <sup>b</sup>                                  | 17/97 (17.5)                       | 21/125 (16.8)  | 2/40 (5.0)   | 1/29 (3.4)   |
| Fulfillment of Amsterdam II criteria –no. (%) <sup>b</sup>                                 | 40/114 (35.1)                      | 42/129 (32.6)  | 2/40 (5.0)   | 1/29 (3.4)   |
| Loss of MMR protein expression –no. (%) <sup>b</sup>                                       | 75/80 (93.8)                       | 117/121 (96.7) | 29/32 (90.6) | 28/29 (96.5) |
| Tumor MSI-high –no. (%) <sup>b</sup>                                                       | 73/76 (96.0)                       | 88/92 (95.7)   | 24/26 (92.3) | 20/21 (95.2) |

MMR, mismatch repair; CRC, colorectal cancer; MSI, microsatellite instability.

<sup>a</sup>Expressed as mean ± standard deviation.

<sup>b</sup>Probands fulfilling the corresponding condition (reflected in the numerator) with respect to those in whom this variable could be evaluated (reflected in the denominator).

<sup>c</sup>With respect to the splenic flexure.

<sup>d</sup>Lynch syndrome-related tumors: colorectal, endometrial, ovarian, gastric, hepatobiliary, small-bowel, urinary tract, pancreatic, and brain cancer.

**Supplementary table 2.** Distribution of germline mismatch repair gene mutations according to the age at colorectal cancer diagnosis<sup>a</sup>.

| Age at diagnosis | Evaluable probands<br>-no. | Germline MMR<br>gene mutation<br>-no. (%) | Distribution of patients<br>with mutations according<br>to age at diagnosis | Distribution of patients with<br>mutations according to age<br>at diagnosis (cumulative) |
|------------------|----------------------------|-------------------------------------------|-----------------------------------------------------------------------------|------------------------------------------------------------------------------------------|
| <15 years        | 0                          | 0 (0.0)                                   | -                                                                           | -                                                                                        |
| 15 to 20 years   | 1                          | 0 (0.0)                                   | -                                                                           | -                                                                                        |
| 21 to 25 years   | 4                          | 1 (25.0)                                  | 1.2%                                                                        | 1.2%                                                                                     |
| 26 to 30 years   | 16                         | 3 (18.7)                                  | 3.7%                                                                        | 4.9%                                                                                     |
| 31 to 35 years   | 29                         | 7 (24.1)                                  | 8.5%                                                                        | 13.4%                                                                                    |
| 36 to 40 years   | 67                         | 7 (10.4)                                  | 8.5%                                                                        | 21.9%                                                                                    |
| 41 to 45 years   | 111                        | 7 (6.3)                                   | 8.5%                                                                        | 30.5%                                                                                    |
| 46 to 50 years   | 212                        | 12 (5.7)                                  | 14.6%                                                                       | 45.1%                                                                                    |
| 51 to 55 years   | 299                        | 4 (1.3)                                   | 4.9%                                                                        | 50.0%                                                                                    |
| 56 to 60 years   | 351                        | 15 (4.3)                                  | 18.3%                                                                       | 68.3%                                                                                    |
| 61 to 65 years   | 449                        | 8 (1.8)                                   | 9.8%                                                                        | 78.0%                                                                                    |
| 66 to 70 years   | 586                        | 6 (1.0)                                   | 7.3%                                                                        | 85.4%                                                                                    |
| 71 to 75 years   | 611                        | 5 (0.8)                                   | 6.1%                                                                        | 91.5%                                                                                    |
| 76 to 80 years   | 518                        | 3 (0.6)                                   | 3.7%                                                                        | 95.1%                                                                                    |
| 81 to 85 years   | 275                        | 4 (1.4)                                   | 4.9%                                                                        | 100%                                                                                     |
| 86 to 90 years   | 118                        | 0 (0.0)                                   | -                                                                           | -                                                                                        |
| 91 to 95 years   | 18                         | 0 (0.0)                                   | -                                                                           | -                                                                                        |
| 96 to 100 years  | 4                          | 0 (0.0)                                   | -                                                                           | -                                                                                        |
| >100 years       | 2                          | 0 (0.0)                                   | -                                                                           | -                                                                                        |
| <b>Total</b>     | <b>3,671</b>               | <b>82 (2.2)</b>                           | <b>100%</b>                                                                 | <b>100%</b>                                                                              |

MMR, mismatch repair.

<sup>a</sup>This analysis was limited to population-based cohorts (n=3,671 probands).

**Supplementary table 3.** Performance characteristics of selected strategies for the identification of patients with Lynch syndrome in the overall series<sup>a</sup>.

| Selected strategy                                                     |                                                                                                 | Evaluable probands <sup>b</sup><br>-no. | Probands requiring tumor MMR testing <sup>c</sup><br>-no. (%) | Probands requiring germline MMR gene analysis <sup>d</sup><br>-no. (%) | Germline MMR gene mutation        |                                       |                                     |                                       |                                                      |                      |                                                 |                                                          |
|-----------------------------------------------------------------------|-------------------------------------------------------------------------------------------------|-----------------------------------------|---------------------------------------------------------------|------------------------------------------------------------------------|-----------------------------------|---------------------------------------|-------------------------------------|---------------------------------------|------------------------------------------------------|----------------------|-------------------------------------------------|----------------------------------------------------------|
|                                                                       |                                                                                                 |                                         |                                                               |                                                                        | Se<br>-no.; %<br>(95% CI)         | Sp<br>-no.; %<br>(95% CI)             | PPV<br>-no.; %<br>(95% CI)          | NPV<br>-no.; %<br>(95% CI)            | Diagnostic yield <sup>e</sup><br>-no.; %<br>(95% CI) | p-value <sup>f</sup> | Incremental diagnostic yield <sup>g</sup><br>-% | False positive yield <sup>h</sup><br>-no.; %<br>(95% CI) |
| Tumor MMR testing in CRC patients fulfilling the following condition: | At least one criterion of revised Bethesda guidelines                                           | 8,644                                   | 3,886 (45.0)                                                  | 547 (6.3)                                                              | 202/233;<br>86.7%<br>(82.1-91.2%) | 8,066/8,411;<br>95.9%<br>(95.4-96.3%) | 202/547;<br>36.9%<br>(32.7-41.0%)   | 8,066/8,097;<br>99.6%<br>(99.4-99.7%) | 202/8,644;<br>2.3%<br>(2.0-2.6%)                     | <.001                | -                                               | 345/8,644;<br>4.0%<br>(3.5-4.4%)                         |
|                                                                       | Multivariate model <sup>i</sup>                                                                 | 8,612                                   | 4,579 (53.2)                                                  | 502 (5.8)                                                              | 206/233;<br>88.4%<br>(84.0-92.7)  | 8,083/8,379;<br>96.5%<br>(96.0-96.8%) | 206/502;<br>41.0%<br>(36.6-45.4%)   | 8,083/8,110;<br>99.7%<br>(99.5-99.8%) | 206/8,612;<br>2.4%<br>(2.0-2.7%)                     | <.001                | 0.06                                            | 296/8,612;<br>3.4%<br>(3.0-3.8%)                         |
|                                                                       | Jerusalem recommendations <sup>i</sup>                                                          | 8,591                                   | 6,658 (77.5)                                                  | 698 (8.1)                                                              | 211/229;<br>92.1%<br>(88.4-95.8%) | 7,875/8,362;<br>94.2%<br>(93.6-94.6%) | 211/698;<br>30.2%<br>(26.4-33.7%)   | 7,875/7,893;<br>99.8%<br>(99.6-99.9%) | 211/8,591;<br>2.5%<br>(2.1-2.8%)                     | .04                  | 0.06                                            | 487/8,591;<br>5.6%<br>(5.1-6.1%)                         |
|                                                                       | Jerusalem recommendations <sup>i</sup> or at least one criterion of revised Bethesda guidelines | 8,638                                   | 7,053 (81.7)                                                  | 777 (9.0)                                                              | 223/233;<br>95.7%<br>(92.8-98.5%) | 7,851/8,405;<br>93.4%<br>(92.8-93.9%) | 223/777;<br>28.7%<br>(25.4-31.9%)   | 7,851/7,861;<br>99.9%<br>(99.7-99.9%) | 223/8,638;<br>2.6%<br>(2.2-2.9%)                     | .09                  | 0.1                                             | 554/8,638;<br>6.4%<br>(5.9-6.9%)                         |
| Tumor MMR testing in any given CRC patient (universal strategy)       |                                                                                                 | 9,701                                   | 9,701 (100)                                                   | 1,068 (11.0)                                                           | 289/301;<br>96.0%<br>(93.6-98.3%) | 8,621/9,400;<br>91.7%<br>(91.1-92.2%) | 289/1,068;<br>27.1%<br>(24.3-29.7%) | 8,621/8,633;<br>99.9%<br>(99.7-99.9%) | 289/9,701;<br>2.9%<br>(2.6-3.3%)                     | Ref.                 | 0.4                                             | 779/9,701;<br>8.0%<br>(7.4-8.5%)                         |

MMR, mismatch repair; Se, sensitivity; Sp, specificity; PPV, positive predictive value; NPV, negative predictive value; PLR, positive likelihood ratio; NLR, negative likelihood ratio; 95% CI, 95% confidence interval; CRC, colorectal cancer.

<sup>a</sup>This analysis was done including both population- and non-population-based cohorts.

<sup>b</sup>Probands in whom the corresponding strategy could be assessed.

<sup>c</sup>Probands requiring tumor MMR testing in each strategy, with respect to those in whom it could be assessed.

<sup>d</sup>Probands requiring germline MMR gene analysis because of the demonstration of tumor MMR deficiency in each strategy, with respect to those in whom it could be assessed.

<sup>e</sup>Diagnostic yield refers to probands requiring germline MMR gene analysis in whom a mutation was found.

<sup>f</sup>Matthews correlation coefficient comparison of diagnostic yield with respect to the universal strategy.

<sup>g</sup>Compared with the next least intensive strategy.

<sup>h</sup>False positive yield refers to probands requiring germline MMR gene analysis in whom no mutation was found.

<sup>i</sup>Age at CRC diagnosis  $\leq 70$  years-old.

<sup>j</sup>Defined as fulfillment of at least one of the following characteristics: CRC diagnosed at age of 60 or younger, at least one first-degree relative with CRC diagnosed at age of 50 or younger, or personal history of metachronous Lynch syndrome-related tumors diagnosed at age of 50 or younger.

**Supplementary table 4.** Performance characteristics of selected strategies for the identification of patients with Lynch syndrome, according to the mismatch repair gene mutated in overall series<sup>a</sup>

| MMR gene    | Selected strategy                                                     |                                                                                                 | Evaluable probands <sup>b</sup><br>-no. | Probands requiring tumor MMR testing <sup>c</sup><br>-no. (%) | Probands requiring germline MMR gene analysis <sup>d</sup><br>-no. (%) | Germline MMR gene mutation        |                                       |                                   |                                       |                        |                     |                      |
|-------------|-----------------------------------------------------------------------|-------------------------------------------------------------------------------------------------|-----------------------------------------|---------------------------------------------------------------|------------------------------------------------------------------------|-----------------------------------|---------------------------------------|-----------------------------------|---------------------------------------|------------------------|---------------------|----------------------|
|             |                                                                       |                                                                                                 |                                         |                                                               |                                                                        | Se<br>-no.; %<br>(95% CI)         | Sp<br>-no. ; %<br>(95% CI)            | PPV<br>-no. ; %<br>(95% CI)       | NPV<br>-no. ; %<br>(95% CI)           | PLR<br>(95% CI)        | NLR<br>(95% CI)     | p-value <sup>e</sup> |
| <b>MLH1</b> | Tumor MMR testing in CRC patients fulfilling the following condition: | At least one criterion of revised Bethesda guidelines                                           | 8,357                                   | 3,676 (43.9)                                                  | 338 (4.0)                                                              | 77/81;<br>95.1%<br>(89.7-100%)    | 8,015/8,276;<br>96.8%<br>(96.4-97.2%) | 77/338;<br>22.8%<br>(18.1-27.4%)  | 8,015/8,019;<br>100%<br>(99.9-100%)   | 29.6<br>(26.4-34.3)    | 0.05<br>(0.02-0.1)  | <.001                |
|             |                                                                       | Jerusalem recommendations <sup>f</sup>                                                          | 8,307                                   | 6,397 (77.0)                                                  | 439 (5.3)                                                              | 76/80 ;<br>95.0%<br>(89.6-100%)   | 7,864/8,227;<br>95.6%<br>(95.1-96.0%) | 76/439;<br>17.3%<br>(13.6-20.9%)  | 7,864/7,868;<br>99.9%<br>(99.8-100%)  | 21.5<br>(19.2-24.0)    | 0.05<br>(0.02-0.1)  | <.001                |
|             |                                                                       | Jerusalem recommendations <sup>f</sup> or at least one criterion of revised Bethesda guidelines | 8,351                                   | 6,781 (81.2)                                                  | 507 (6.1)                                                              | 79/81;<br>97.5%<br>(93.5-100%)    | 7,842/8,270;<br>94.8%<br>(94.3-95.3%) | 79/507;<br>15.6%<br>(12.3-18.8%)  | 7,842/7,844;<br>100%<br>(99.9-100%)   | 18.7<br>(17.0-20.8)    | 0.02<br>(0.01-0.1)  | <.001                |
|             |                                                                       | Multivariate model <sup>g</sup>                                                                 | 8,325                                   | 4,354 (52.3)                                                  | 279 (3.4)                                                              | 73/81;<br>90.1%<br>(83.0-97.2%)   | 8,038/8,244;<br>97.5%<br>(97.1-97.8%) | 73/279;<br>26.2%<br>(20.8-31.5%)  | 8,038/8,046;<br>99.9%<br>(99.8-99.9%) | 36.0<br>(30.9-42.0)    | 0.1<br>(0.05-0.2)   | <.001                |
|             | Tumor MMR testing in any given CRC patient (universal strategy)       |                                                                                                 | 9,347                                   | 9,347 (100)                                                   | 722 (7.7)                                                              | 103/108;<br>95.4%<br>(90.9-99.8%) | 8,620/9,239;<br>93.3%<br>(92.7-93.8%) | 103/722;<br>14.3%<br>(11.6-16.8%) | 8,620/8,625;<br>99.9%<br>(99.8-100%)  | 14.2<br>(130-15.5)     | 0.05<br>(0.02-0.1)  | Ref.                 |
| <b>MSH2</b> | Tumor MMR testing in CRC patients fulfilling the following condition: | At least one criterion of revised Bethesda guidelines                                           | 7,938                                   | 3,499 (44.0)                                                  | 162 (2.0)                                                              | 88/96;<br>91.7%<br>(85.6-97.7%)   | 7,768/7,842;<br>99.1%<br>(98.8-99.2%) | 88/162;<br>54.3%<br>(46.3-62.3%)  | 7,768/7,776;<br>99.9%<br>(99.8-99.9%) | 101.8<br>(76.8-122.8)  | 0.08<br>(0.04-0.1)  | <.001                |
|             |                                                                       | Jerusalem recommendations <sup>f</sup>                                                          | 7,892                                   | 6,138 (77.7)                                                  | 180 (2.3)                                                              | 88/93;<br>94.6%<br>(89.5-99.7%)   | 7,707/7,799;<br>98.8%<br>(98.5-99.0%) | 88/180;<br>48.9%<br>(41.3-56.4%)  | 7,707/7,712;<br>99.9%<br>(99.8-100%)  | 78.8<br>(65.1-98.8)    | 0.05<br>(0.02-0.1)  | <.001                |
|             |                                                                       | Jerusalem recommendations <sup>f</sup> or at least one criterion of revised Bethesda guidelines | 7,933                                   | 6,470 (81.5)                                                  | 196 (2.5)                                                              | 95/96;<br>99.0%<br>(96.4-100%)    | 7,736/7,837;<br>98.7%<br>(98.4-98.9%) | 95/196;<br>48.5%<br>(41.2-55.7%)  | 7,736/7,737;<br>100%<br>(99.9-100%)   | 76.1<br>(63.1-93.3)    | 0.01<br>(0.0-0.07)  | <.001                |
|             |                                                                       | Multivariate model <sup>g</sup>                                                                 | 7,910                                   | 4,233 (53.5)                                                  | 158 (2.0)                                                              | 91/96;<br>94.8%<br>(89.8-99.7%)   | 7,747/7,814;<br>99.1%<br>(98.9-99.3%) | 91/158;<br>57.6%<br>(49.5-65.6%)  | 7,747/7,752;<br>99.9%<br>(99.8-100%)  | 105.3<br>(86.7-140.9)  | 0.05<br>(0.02-0.1)  | <.001                |
|             | Tumor MMR testing in any given CRC patient (universal strategy)       |                                                                                                 | 8,896                                   | 8,896 (100)                                                   | 273 (3.1)                                                              | 125/128;<br>97.7%<br>(94.6-100%)  | 8,620/8,768;<br>98.3%<br>(98.0-98.6%) | 125/273;<br>45.8%<br>(39.6-51.8%) | 8,620/8,623;<br>100%<br>(99.9-100%)   | 54.1<br>(49.2-68.0)    | 0.02<br>(0.01-0.07) | Ref.                 |
| <b>MSH6</b> | Tumor MMR testing in CRC patients fulfilling the following condition: | At least one criterion of revised Bethesda guidelines                                           | 7,806                                   | 3,382 (43.3)                                                  | 47 (0.6)                                                               | 14/28;<br>50.0%<br>(29.7-70.3%)   | 7,745/7,778;<br>99.6%<br>(99.4-99.7%) | 14/47;<br>29.8%<br>(15.6-43.9%)   | 7,745/7,759;<br>99.8%<br>(99.7-99.9%) | 125.0<br>(71.2-194.9)  | 0.5<br>(0.3-0.7)    | <.001                |
|             |                                                                       | Jerusalem recommendations <sup>f</sup>                                                          | 7,765                                   | 6,016 (77.4)                                                  | 62 (0.8)                                                               | 22/28;<br>78.6%<br>(61.6-95.5%)   | 7,697/7,737;<br>99.5%<br>(99.3-99.6%) | 22/62;<br>35.5%<br>(22.7-48.2%)   | 7,697/7,703;<br>99.9%<br>(99.8-99.9%) | 157.2<br>(105.5-218.8) | 0.2<br>(0.1-0.4)    | .537                 |
|             |                                                                       | Jerusalem recommendations <sup>f</sup> or at least one criterion of revised Bethesda guidelines | 7,803                                   | 6,342 (81.2)                                                  | 73 (0.9)                                                               | 23/28;<br>82.1%<br>(66.1-98.1%)   | 7,725/7,775;<br>99.3%<br>(99.1-99.5%) | 23/73;<br>31.5%<br>(20.1-42.8%)   | 7,725/7,730;<br>99.9%<br>(99.8-100%)  | 117.0<br>(92.2-176.9)  | 0.1<br>(0.08-0.4)   | .257                 |

|             |                                                                       |                                                                                                 |                                                                 |              |             |                                 |                                       |                                       |                                      |                                     |                        |                    |
|-------------|-----------------------------------------------------------------------|-------------------------------------------------------------------------------------------------|-----------------------------------------------------------------|--------------|-------------|---------------------------------|---------------------------------------|---------------------------------------|--------------------------------------|-------------------------------------|------------------------|--------------------|
|             |                                                                       | Multivariate model <sup>g</sup>                                                                 | 7,780                                                           | 4,118 (52.9) | 47 (0.6)    | 17/28;<br>60.7%<br>(40.8-80.6%) | 7,722/7,752;<br>99.6%<br>(99.4-99.7%) | 17/47;<br>36.2%<br>(21.3-50.9)        | 7,722/7,733;<br>99.9%<br>(99.7-99.9) | 151.7<br>(98.5-249.8)               | 0.4<br>(0.2-0.6)       | <.001              |
|             |                                                                       | Tumor MMR testing in any given CRC patient (universal strategy)                                 | 8,729                                                           | 8,729 (100)  | 111 (1.3)   | 33/36;<br>91.7%<br>(81.2-100%)  | 8,615/8,693;<br>99.1%<br>(98.9-99.3%) | 33/111;<br>29.7%<br>(20.7-38.8%)      | 8,615/8,618;<br>100%<br>(99.9-100%)  | 101.8<br>(80.2-130.1)               | 0.08<br>(0.03-0.2)     | Ref.               |
| <b>PMS2</b> | Tumor MMR testing in CRC patients fulfilling the following condition: | At least one criterion of revised Bethesda guidelines                                           | 7,756                                                           | 3,369 (43.4) | 37 (0.5)    | 23/28;<br>82.1%<br>(66.1-98.1%) | 7,714/7,728;<br>99.8%<br>(99.7-99.9%) | 23/37;<br>62.2%<br>(45.1-79.1%)       | 7,714/7,719;<br>99.9%<br>(99.8-100%) | 410.5<br>(261.3-786.7)              | 0.1<br>(0.08-0.4)      | .096               |
|             |                                                                       | Jerusalem recommendations <sup>f</sup>                                                          | 7,719                                                           | 5,996 (77.6) | 44 (0.6)    | 25/28;<br>89.3%<br>(76.0-100%)  | 7,672/7,691;<br>99.8%<br>(99.6-99.9%) | 25/44;<br>56.8%<br>(41.0-72.6%)       | 7,672/7,675;<br>100%<br>(99.9-100%)  | 446.5<br>(226.5-576.5)              | 0.1<br>(0.04-0.3)      | .161               |
|             |                                                                       | Jerusalem recommendations <sup>f</sup> or at least one criterion of revised Bethesda guidelines | 7,756                                                           | 6,312 (81.3) | 46 (0.6)    | 26/28;<br>92.9%<br>(81.5-100%)  | 7,708/7,728;<br>99.7%<br>(99.6-99.8%) | 26/46; 56.5%<br>(41.1-71.9%)          | 7,708/7,710;<br>100%<br>(99.9-100%)  | 309.6<br>(228.8-562.4)              | 0.07<br>(0.02-0.2)     | .002               |
|             |                                                                       | Multivariate model <sup>g</sup>                                                                 | 7,734                                                           | 4,109 (53.1) | 40 (0.5)    | 25/28;<br>89.3%<br>(76.0-100%)  | 7,691/7,706;<br>99.8%<br>(99.7-99.9%) | 25/40;<br>62.5%<br>(46.2-78.7%)       | 7,691/7,694;<br>100%<br>(99.9-100%)  | 446.5<br>(272.2-772.7)              | 0.1<br>(0.04-0.3)      | <.001              |
|             |                                                                       |                                                                                                 | Tumor MMR testing in any given CRC patient (universal strategy) | 8,662        | 8,662 (100) | 55 (0.6)                        | 28/29;<br>96.6%<br>(88.2-100%)        | 8,606/8,633;<br>99.7%<br>(99.5-99.8%) | 28/55;<br>50.9%<br>(36.8-65.0%)      | 8,606/8,607;<br>100%<br>(99.9-100%) | 322.0<br>(210.5-452.7) | 0.03<br>(0.01-0.2) |

MMR, mismatch repair; Se, sensitivity; Sp, specificity; PPV, positive predictive value; NPV, negative predictive value; PLR, positive likelihood ratio; NLR, negative likelihood ratio; 95% CI, 95% confidence interval; CRC, colorectal cancer.

<sup>a</sup>This analysis was done including both population- and non-population-based cohorts.

<sup>b</sup>Probands in whom the corresponding strategy could be assessed.

<sup>c</sup>Probands requiring tumor MMR testing in each strategy, with respect to those in whom it could be assessed.

<sup>d</sup>Probands requiring germline MMR gene analysis because of the demonstration of tumor MMR deficiency in each strategy, with respect to those in whom it could be assessed.

<sup>e</sup>With respect to universal strategy (comparing Mathews correlation coefficients).

<sup>f</sup>Age at CRC diagnosis  $\leq$ 70 years-old.

## **Supplementary note.** Investigators of the EPICOLON Consortium.

Hospital Clínic, Barcelona: Antoni Castells (local coordinator), Francesc Balaguer, Leticia Moreira, Sergi Castellví-Bel, Virgínia Piñol, Victoria Gonzalo, Teresa Ocaña, María Pellisé, Miriam Cuatrecasas, María Dolores Giráldez, Anna Serradesanferm, Josep M. Piqué; Parc de Salut Mar, Barcelona: Montserrat Andreu (local coordinator), Xavier Bessa, Anna Abulí, Mar Iglesias, Agustín Seoane, Felipe Bory, Gemma Navarro, Beatriz Bellosillo, Josep M<sup>a</sup> Dedeu, Cristina Álvarez, Marc Puigvehí; Hospital 12 de Octubre, Madrid: Juan Diego Morillas (local coordinator), Raquel Muñoz, Marisa Manzano, Francisco Colina, Jose Díaz, Carolina Ibarrola, Guadalupe López, Alberto Ibáñez; Hospital Clínico Universitario, Zaragoza: Ángel Lanás (local coordinator), Javier Alcedo, Javier Ortego; Hospital Cristal-Piñor, Complejo Hospitalario de Ourense: Joaquín Cubiella (local coordinator), M<sup>a</sup> Soledad Díez, Mercedes Salgado, Eloy Sánchez, Mariano Vega; Hospital San Eloy, Baracaldo and Hospital Donostia, CIBERehd, University of Country Basque, San Sebastián: Luis Bujanda (local coordinator) Ángel Cosme, Inés Gil, Mikel Larzabal, Carlos Placer, María del Mar Ramírez, Elisabeth Hijona, Jose M. Enríquez-Navascués, Jose L. Elosegui; Hospital General Universitario de Alicante: Artemio Payá (EPICOLON phase 1 local coordinator), Rodrigo Jover (EPICOLON phase 2 local coordinator), Cristina Alenda, Laura Sempere, Nuria Acame, Estefanía Rojas, Lucía Pérez-Carbonell; Hospital General de Granollers: Joaquim Rigau (local coordinator), Ángel Serrano, Anna Giménez; Hospital General de Vic: Joan Saló (local coordinator), Eduard Batiste-Alentorn, Josefina Autonell, Ramon Barniol; Hospital General Universitario de Guadalajara and Fundación para la Formación e Investigación Sanitarias, Murcia: Ana María García (local coordinator), Fernando Carballo, Antonio Bienvenido, Eduardo Sanz, Fernando González, Jaime Sánchez, Akiko Ono; Hospital General Universitario de Valencia: Mercedes Latorre (local coordinator), Enrique Medina, Jaime Cuquerella, Pilar Canelles, Miguel Martorell, José Ángel García, Francisco Quiles, Elisa Orti; CHUVI-Hospital Meixoeiro, Vigo, EPICOLON phase 1: Juan Clofent (local coordinator), Jaime Seoane, Antoni Tardío, Eugenia Sanchez; EPICOLON phase 2: M<sup>a</sup> Luisa de Castro (local coordinator), Antoni Tardío, Juan Clofent, Vicent Hernández; Hospital Universitari Germans Trias i Pujol, Badalona: Xavier Llor (local coordinator), Rosa M. Xicola, Marta Piñol, Mercè Rosinach, Anna Roca, Elisenda Pons, José M. Hernández, Miquel A. Gassull; Hospital Universitari Mútua de Terrassa: Fernando Fernández-Bañares (local coordinator), Josep M. Viver, Antonio Salas, Jorge Espinós, Montserrat Forné, Maria Esteve; Hospital Universitari Arnau de Vilanova, Lleida: Josep M. Reñé (local coordinator), Carmen Piñol, Juan Buenestado, Joan Viñas; Hospital Universitario de Canarias: Enrique Quintero (local coordinator), David Nicolás, Adolfo Parra, Antonio Martín; Hospital Universitario La Fe, Valencia: Lidia Argüello (local coordinator), Vicente Pons, Virginia Pertejo, Teresa Sala; Hospital Sant Pau, Barcelona: Dolors Gonzalez (local coordinator), Eva Roman, Teresa Ramon, Maria Poca, M<sup>a</sup> Mar Concepción, Marta Martin, Lourdes Pétriz; Hospital Xeral Cies, Vigo: Daniel Martinez (local coordinator); Fundacion Publica Galega de Medicina Xenomica (FPGMX), CIBERER, Genomic Medicine Group-University of Santiago de Compostela, Santiago de Compostela: Ángel Carracedo (local coordinator), Clara Ruiz-Ponte, Ceres Fernández-Rozadilla, M<sup>a</sup> Magdalena Castro; Hospital Universitario Central de Asturias: Sabino Riestra (local coordinator), Luis Rodrigo; Hospital de Galdácano, Vizcaya: Javier Fernández (local coordinator), Jose Luis Cabriada; Fundación Hospital de Calahorra, La Rioja: Luis Carreño (local coordinator), Susana Oquiñena, Federico Bolado; Hospital Royo Villanova, Zaragoza: Elena Peña (local coordinator), José Manuel Blas, Gloria Ceña, Juan José Sebastián; Hospital Universitario Reina Sofía, Córdoba: Antonio Naranjo (local coordinator).
